# Supplementary material
Source: publisher figshare collection journal article supplement (https://gsajournals.figshare.com/ndownloader/files/13843766)
Supplement: Supplementary file 1 [file 13843766]

## Sheet: S1 Table.txt
chrom	pos	ref	alt	maximum_allele_frequency	num_suppressors_pass_0.7_allele_frequency	upstream_gene	downstream_gene	overlapping_gene	gene_effect	YGDP939	YMS6
chrI	177	G	C	0.2815	0	YAL069W	YAL068C	NONE	NONE	0.0631	0.2815
chrI	181	C	T	0.259	0	YAL069W	YAL068C	NONE	NONE	0.0472	0.259
chrI	1770	T	G	0.367	0	YAL067W-A	YAL068C	NONE	NONE	0.007	0.367
chrI	12621	T	C	0.2566	0	YAL065C	YAL064W-B	NONE	NONE	0.0783	0.2566
chrI	20409	A	G	0.2765	0	YAL064W	YAL063C-A	NONE	NONE	0.0922	0.2765
chrI	23844	T	C	0.2725	0	YAL063C-A	YAL063C	NONE	NONE	0.0928	0.2725
chrI	25453	T	G	0.2713	0	YAL063C-A	YAL064W	YAL063C	SYNONYMOUS_CODING	0.0297	0.2713
chrI	25462	G	A	0.3744	0	YAL063C-A	YAL064W	YAL063C	SYNONYMOUS_CODING	0.0277	0.3744
chrI	25465	G	A	0.3947	0	YAL063C-A	YAL064W	YAL063C	SYNONYMOUS_CODING	0.0236	0.3947
chrI	25524	C	T	0.2759	0	YAL063C-A	YAL064W	YAL063C	NON_SYNONYMOUS_CODING	0.027	0.2759
chrI	26992	C	T	0.6	0	YAL063C-A	NONE	YAL063C	SYNONYMOUS_CODING	0	0.6
chrI	26995	A	G	0.6	0	YAL063C-A	NONE	YAL063C	SYNONYMOUS_CODING	0	0.6
chrI	26998	T	C	0.625	0	YAL063C-A	NONE	YAL063C	SYNONYMOUS_CODING	0.0667	0.625
chrI	205676	C	T	0.5	0	YAR053W	NONE	YAR050W	SYNONYMOUS_CODING	0	0.5
chrI	205883	A	G	0.5116	0	YAR053W	NONE	YAR050W	SYNONYMOUS_CODING	0	0.5116
chrI	205940	C	G	0.7883	1	YAR053W	NONE	YAR050W	SYNONYMOUS_CODING	0	0.7883
chrI	206015	T	G	0.2874	0	YAR053W	NONE	YAR050W	SYNONYMOUS_CODING	0.0741	0.2874
chrI	206018	A	T	0.2622	0	YAR053W	NONE	YAR050W	SYNONYMOUS_CODING	0.0909	0.2622
chrI	206021	T	C	0.3097	0	YAR053W	NONE	YAR050W	SYNONYMOUS_CODING	0.0556	0.3097
chrI	206210	C	G	0.6842	0	YAR053W	NONE	YAR050W	SYNONYMOUS_CODING	0.0833	0.6842
chrII	6902	C	T	0.3194	0	YBL108W	YBL108C-A	NONE	NONE	0.0385	0.3194
chrII	6909	A	C	0.2823	0	YBL108W	YBL108C-A	NONE	NONE	0.0435	0.2823
chrII	6910	C	T	0.2957	0	YBL108W	YBL108C-A	NONE	NONE	0.0405	0.2957
chrII	7003	G	T	0.2723	0	YBL108W	YBL108C-A	NONE	NONE	0.099	0.2723
chrII	7004	C	T	0.2743	0	YBL108W	YBL108C-A	NONE	NONE	0.099	0.2743
chrII	7023	C	T	0.3165	0	YBL108W	YBL108C-A	NONE	NONE	0.0515	0.3165
chrII	33388	T	C	0.2542	0	tF(GAA)B	YBL100W-A	YBL100W-B	SYNONYMOUS_CODING	0.0833	0.2542
chrII	33389	A	C	0.25	0	tF(GAA)B	YBL100W-A	YBL100W-B	NON_SYNONYMOUS_CODING	0.0833	0.25
chrII	299553	A	T	0.5156	0	YBR031W	NONE	YBR030W	NON_SYNONYMOUS_CODING	0.0442	0.5156
chrII	435389	G	A	10	1	YBR096W	YBR094W	YBR095C	STOP_GAINED	0	10
chrIII	295231	C	T	0.3179	0	tT(AGU)C	YCR097W-A	NONE	NONE	0.0972	0.3179
chrIII	303385	C	T	0.3365	0	YCR101C	YCR102C	NONE	NONE	0.0786	0.3365
chrIII	303450	T	C	0.2737	0	YCR101C	YCR102C	NONE	NONE	0.0388	0.2737
chrIII	307462	C	T	0.3103	0	YCR104W	YCR102W-A	NONE	NONE	0	0.3103
chrIII	307465	G	A	0.3654	0	YCR104W	YCR102W-A	NONE	NONE	0.05	0.3654
chrIII	307627	G	A	0.5714	0	YCR104W	YCR102W-A	NONE	NONE	0	0.5714
chrIII	315770	G	A	0.284	0	NONE	YCR108C	NONE	NONE	0.0275	0.284
chrIII	315830	G	T	0.2605	0	NONE	YCR108C	NONE	NONE	0.0206	0.2605
chrIV	1454	A	G	0.4545	0	YDL248W	NONE	NONE	NONE	0	0.4545
chrIV	1494	C	T	0.5882	0	YDL248W	NONE	NONE	NONE	0	0.5882
chrIV	1511	C	T	0.5238	0	YDL248W	NONE	NONE	NONE	0	0.5238
chrIV	1651	C	T	0.4412	0	YDL248W	NONE	NONE	NONE	0	0.4412
chrIV	11942	G	A	0.2742	0	YDL246C	YDL247W	YDL245C	SYNONYMOUS_CODING	0	0.2742
chrIV	384339	G	A	0.7143	1	YDL039C	YDL037C	NONE	NONE	0.093	0.7143
chrIV	384394	G	A	0.5854	0	YDL039C	YDL037C	NONE	NONE	0	0.5854
chrIV	384399	A	G	0.6522	0	YDL039C	YDL037C	NONE	NONE	0.0233	0.6522
chrIV	390544	A	G	0.2898	0	YDL034W	YDL033C	YDL035C	SYNONYMOUS_CODING	0	0.2898
chrIV	579703	A	G	0.9966	1	YDR065W	YDR063W	YDR064W	INTRON	0	0.9966
chrIV	877792	G	A	0.2638	0	NONE	YDR210W-B	NONE	NONE	0	0.2638
chrIV	1524872	T	C	0.2578	0	YDR545W	YDR544C	YDR543C	NON_SYNONYMOUS_CODING	0.0098	0.2578
chrV	569917	G	A	0.2894	0	YER188C-A	YER188W	NONE	NONE	0.0833	0.2894
chrVI	6351	A	G	0.2727	0	YFL062W	YFL063W	NONE	NONE	0	0.2727
chrVII	228080	A	C	10	1	YGL145W	YGL148W	YGL147C	SYNONYMOUS_CODING	0	10
chrVII	307214	C	T	0.6667	0	YGL105W	YGL106W	NONE	NONE	0	0.6667
chrVII	639677	G	A	0.25	0	YGR077C	YGR078C	NONE	NONE	0.0809	0.25
chrVII	817469	A	C	0.3929	0	NONE	YGR161C-D	NONE	NONE	0	0.3929
chrVII	819989	T	C	0.3958	0	tV(AAC)G2	YGR161C-C	YGR161C-D	NON_SYNONYMOUS_CODING	0	0.3958
chrVII	823799	T	A	0.4085	0	YGR162W	tV(AAC)G2	NONE	NONE	0.0789	0.4085
chrVIII	6082	T	A	0.3226	0	YHL048C-A	YHL047C	NONE	NONE	0	0.3226
chrVIII	6087	C	T	0.348	0	YHL048C-A	YHL047C	NONE	NONE	0	0.348
chrVIII	6104	A	T	0.3781	0	YHL048W	YHL047C	NONE	NONE	0.0217	0.3781
chrVIII	6114	C	T	0.3107	0	YHL048W	YHL047C	NONE	NONE	0.0288	0.3107
chrVIII	6116	C	T	0.2997	0	YHL048W	YHL047C	NONE	NONE	0.0272	0.2997
chrVIII	6118	G	C	0.3071	0	YHL048W	YHL047C	NONE	NONE	0.0256	0.3071
chrVIII	6123	G	A	0.2938	0	YHL048W	YHL047C	NONE	NONE	0.0914	0.2938
chrVIII	94339	T	A	10	1	YHL006W-A	YHL007C	YHL008C	NON_SYNONYMOUS_CODING	0	10
chrVIII	146409	G	A	0.4461	0	tA(AGC)H	YHR020W	NONE	NONE	0.0303	0.4461
chrVIII	526333	T	A	0.296	0	YHR210C	NONE	YHR211W	SYNONYMOUS_CODING	0.072	0.296
chrVIII	526444	C	T	0.2619	0	YHR210C	NONE	YHR211W	SYNONYMOUS_CODING	0.033	0.2619
chrVIII	526450	T	C	0.4321	0	YHR210C	NONE	YHR211W	SYNONYMOUS_CODING	0.0732	0.4321
chrVIII	526729	C	T	0.2526	0	YHR210C	NONE	YHR211W	SYNONYMOUS_CODING	0.082	0.2526
chrVIII	526732	T	C	0.2521	0	YHR210C	NONE	YHR211W	SYNONYMOUS_CODING	0.0876	0.2521
chrVIII	526795	C	T	0.3011	0	NONE	NONE	YHR211W	SYNONYMOUS_CODING	0.061	0.3011
chrVIII	526858	T	G	0.4215	0	NONE	NONE	YHR211W	SYNONYMOUS_CODING	0.0967	0.4215
chrVIII	526960	T	C	0.327	0	NONE	NONE	YHR211W	SYNONYMOUS_CODING	0.006	0.327
chrVIII	526993	G	T	0.3389	0	NONE	NONE	YHR211W	SYNONYMOUS_CODING	0.0779	0.3389
chrVIII	527216	G	A	0.2672	0	NONE	NONE	YHR211W	NON_SYNONYMOUS_CODING	0.0208	0.2672
chrVIII	527218	T	G	0.2636	0	NONE	NONE	YHR211W	SYNONYMOUS_CODING	0.0182	0.2636
chrVIII	527797	T	G	0.259	0	NONE	NONE	YHR211W	SYNONYMOUS_CODING	0.0486	0.259
chrVIII	527851	G	A	0.3431	0	NONE	NONE	YHR211W	SYNONYMOUS_CODING	0.0513	0.3431
chrVIII	530860	T	G	0.2993	0	NONE	YHR211W	NONE	NONE	0.065	0.2993
chrVIII	531141	T	G	0.2658	0	NONE	YHR211W	NONE	NONE	0.0813	0.2658
chrVIII	531148	T	C	0.2674	0	NONE	YHR211W	NONE	NONE	0.0732	0.2674
chrVIII	554063	A	G	0.2722	0	YHR216W	YHR215W	NONE	NONE	0.0753	0.2722
chrIX	8192	T	A	0.4	0	YIL175W	YIL176C	NONE	NONE	0	0.4
chrIX	8286	G	T	0.2558	0	YIL175W	YIL176C	NONE	NONE	0	0.2558
chrIX	8317	T	C	0.3913	0	YIL175W	YIL176C	NONE	NONE	0	0.3913
chrIX	8399	G	T	0.2632	0	YIL175W	YIL176C	NONE	NONE	0	0.2632
chrIX	8405	A	T	0.4118	0	YIL175W	YIL176C	NONE	NONE	0	0.4118
chrIX	25418	T	C	0.3494	0	YIL168W	YIL170W	YIL169C	NON_SYNONYMOUS_CODING	0	0.3494
chrIX	91438	C	T	10	1	YIL138C	YIL140W	YIL137C	NON_SYNONYMOUS_CODING	0	10
chrIX	248020	T	C	10	1	tS(UGA)I	YIL058W	YIL057C	NON_SYNONYMOUS_CODING	0	10
chrIX	437886	G	A	0.3447	0	YIR043C	YIR044C	NONE	NONE	0.0089	0.3447
chrIX	437891	T	C	0.3563	0	YIR043C	YIR044C	NONE	NONE	0.0083	0.3563
chrIX	437932	A	C	0.3083	0	YIR043C	YIR044C	NONE	NONE	0.0604	0.3083
chrIX	437936	C	A	0.3038	0	YIR043C	YIR044C	NONE	NONE	0.0067	0.3038
chrIX	438550	G	C	0.3418	0	YIR044C	YIR041W	NONE	NONE	0.0743	0.3418
chrIX	438564	C	T	0.2668	0	YIR044C	YIR041W	NONE	NONE	0	0.2668
chrIX	438567	A	C	0.2546	0	YIR044C	YIR041W	NONE	NONE	0	0.2546
chrIX	438568	T	G	0.263	0	YIR044C	YIR041W	NONE	NONE	0	0.263
chrIX	439002	G	A	0.2793	0	YIR044C	YIR041W	NONE	NONE	0.0233	0.2793
chrIX	439008	C	T	0.3192	0	YIR044C	YIR041W	NONE	NONE	0.0588	0.3192
chrIX	439551	G	A	0.2698	0	YIR044C	NONE	NONE	NONE	0.0915	0.2698
chrIX	439571	A	G	0.3111	0	YIR044C	NONE	NONE	NONE	0.0727	0.3111
chrIX	439623	G	A	0.3183	0	YIR044C	NONE	NONE	NONE	0.0707	0.3183
chrX	304204	G	A	10	1	YJL074C	YJL072C	YJL073W	SYNONYMOUS_CODING	0	10
chrX	715090	G	T	0.5367	0	YJR151W-A	NONE	YJR151C	NON_SYNONYMOUS_CODING	0.0741	0.5367
chrX	745287	A	G	0.2524	0	YJR162C	NONE	NONE	NONE	0.019	0.2524
chrX	745689	T	G	0.4725	0	YJR162C	NONE	NONE	NONE	0.0588	0.4725
chrXI	144867	T	C	0.6446	0	YKL164C	YKL162C-A	YKL163W	SYNONYMOUS_CODING	0.0435	0.6446
chrXI	144888	G	A	0.2786	0	YKL164C	YKL162C-A	YKL163W	SYNONYMOUS_CODING	0.0886	0.2786
chrXI	613438	G	A	0.3386	0	YKR093W	YKR091W	YKR092C	SYNONYMOUS_CODING	0.0794	0.3386
chrXII	11458	G	A	0.29	0	YLL065W	YLL064C	NONE	NONE	0.0227	0.29
chrXII	11481	T	C	0.2716	0	YLL065W	YLL064C	NONE	NONE	0	0.2716
chrXII	172326	C	G	10	1	YLR012C	YLR013W	YLR014C	NON_SYNONYMOUS_CODING	0	10
chrXII	881947	C	T	10	1	YLR383W	YLR381W	NONE	NONE	0.0159	10
chrXII	981458	A	G	0.4474	0	YLR425W	NONE	NONE	NONE	0	0.4474
chrXII	1064563	C	T	0.2706	0	YLR462W	YLR461W	NONE	NONE	0.0783	0.2706
chrXIII	154	G	A	0.7143	1	YML133W-B	YML133C	NONE	NONE	0.0833	0.7143
chrXIII	587664	T	C	0.4671	0	tV(AAC)M3	YMR165C	YMR164C	NON_SYNONYMOUS_CODING	0	0.4671
chrXIII	587676	C	T	0.2963	0	tV(AAC)M3	YMR165C	YMR164C	NON_SYNONYMOUS_CODING	0	0.2963
chrXIII	587678	A	G	0.2936	0	tV(AAC)M3	YMR165C	YMR164C	SYNONYMOUS_CODING	0	0.2936
chrXIII	588575	T	C	0.7949	1	tV(AAC)M3	YMR165C	YMR164C	SYNONYMOUS_CODING	0	0.7949
chrXIII	588584	T	C	0.7881	1	tV(AAC)M3	YMR165C	YMR164C	SYNONYMOUS_CODING	0	0.7881
chrXIII	588608	C	T	0.2687	0	tV(AAC)M3	YMR165C	YMR164C	SYNONYMOUS_CODING	0	0.2687
chrXIII	588644	T	C	0.2716	0	tV(AAC)M3	YMR165C	YMR164C	SYNONYMOUS_CODING	0.0645	0.2716
chrXIII	670275	G	T	10	1	RNA170	YMR203W	YMR204C	SYNONYMOUS_CODING	0	10
chrXIII	715657	A	T	0.9959	1	YMR221C	YMR220W	YMR222C	NON_SYNONYMOUS_CODING	0	0.9959
chrXIII	908147	A	G	0.2786	0	YMR316C-B	YMR316W	YMR317W	SYNONYMOUS_CODING	0.0913	0.2786
chrXIII	908374	T	C	0.2926	0	YMR316C-B	YMR316W	YMR317W	NON_SYNONYMOUS_CODING	0	0.2926
chrXIII	908561	A	G	0.2638	0	YMR316C-B	YMR318C	YMR317W	SYNONYMOUS_CODING	0.025	0.2638
chrXIII	908573	G	A	0.3081	0	YMR316C-B	YMR318C	YMR317W	SYNONYMOUS_CODING	0.0081	0.3081
chrXIII	908590	C	T	0.373	0	YMR316C-B	YMR318C	YMR317W	NON_SYNONYMOUS_CODING	0.0207	0.373
chrXIII	923861	G	A	0.4815	0	YMR326C	YMR325W	NONE	NONE	0	0.4815
chrXIII	924069	G	A	0.4286	0	YMR326C	YMR325W	NONE	NONE	0	0.4286
chrXIII	924072	G	T	0.449	0	YMR326C	YMR325W	NONE	NONE	0	0.449
chrXIII	924096	A	G	0.32	0	YMR326C	YMR325W	NONE	NONE	0.0303	0.32
chrXIII	924104	A	T	0.4524	0	YMR326C	YMR325W	NONE	NONE	0.0312	0.4524
chrXIII	924393	T	G	0.2593	0	YMR326C	YMR325W	NONE	NONE	0.0323	0.2593
chrXIV	6501	A	C	0.339	0	YNL338W	YNL339W-A	NONE	NONE	0.0385	0.339
chrXIV	102325	C	T	0.7143	1	YNL284C-A	YNL284C	NONE	NONE	0	0.7143
chrXIV	102476	A	G	0.75	1	tN(GUU)N1	YNL284C	NONE	NONE	0	0.75
chrXIV	102479	A	G	0.75	1	tN(GUU)N1	YNL284C	NONE	NONE	0	0.75
chrXIV	102483	A	G	0.6667	0	tN(GUU)N1	YNL284C	NONE	NONE	0	0.6667
chrXIV	102488	T	C	0.7	1	tN(GUU)N1	YNL284C	NONE	NONE	0	0.7
chrXIV	415056	C	T	0.4304	0	YNL114C	YNL113W	YNL112W	INTRON	0	0.4304
chrXIV	415090	C	T	0.6161	0	YNL114C	YNL111C	YNL112W	INTRON	0.0484	0.6161
chrXIV	415098	C	T	0.5452	0	YNL114C	YNL111C	YNL112W	INTRON	0.0727	0.5452
chrXIV	479913	A	T	0.2921	0	YNL079C	YNL082W	YNL078W	SYNONYMOUS_CODING	0	0.2921
chrXIV	479915	A	G	0.2862	0	YNL079C	YNL082W	YNL078W	NON_SYNONYMOUS_CODING	0	0.2862
chrXIV	479918	T	C	0.2817	0	YNL079C	YNL082W	YNL078W	NON_SYNONYMOUS_CODING	0	0.2817
chrXIV	523234	A	T	0.2636	0	YNL054W	YNL054W-A	YNL054W-B	EXON	0	0.2636
chrXIV	742644	A	G	0.9972	1	YNR063W	YNR061C	NONE	NONE	0	0.9972
chrXIV	781372	G	C	0.3419	0	YNR076W	YNR075C-A	NONE	NONE	0.0989	0.3419
chrXIV	783805	G	A	0.8	1	YNR077C	YNR076W	NONE	NONE	0	0.8
chrXIV	783806	G	A	0.7778	1	YNR077C	YNR076W	NONE	NONE	0	0.7778
chrXIV	783972	A	T	0.4333	0	YNR077C	YNR076W	NONE	NONE	0.087	0.4333
chrXV	407	T	C	0.2865	0	YOL166W-A	YOL166C	NONE	NONE	0.0891	0.2865
chrXV	426367	C	G	10	1	YOR051C	YOR052C	NONE	NONE	0	10
chrXV	655535	T	A	10	1	YOR171C	YOR170W	YOR172W	NON_SYNONYMOUS_CODING	0	10
chrXVI	850641	G	T	0.2807	0	NONE	YPR158C-D	NONE	NONE	0	0.2807
chrXVI	850687	T	C	0.4231	0	NONE	YPR158C-D	NONE	NONE	0	0.4231
chrXVI	850690	G	C	0.4091	0	NONE	YPR158C-D	NONE	NONE	0	0.4091
